# Supplementary material for: Developing a Physiologically-Based Pharmacokinetic Model Knowledgebase in Support of Provisional Model Construction
Source: PLoS Comput Biol. 2016 Feb 12;12(2):e1004495. doi: 10.1371/journal.pcbi.1004495 (PMC4752336; doi:10.1371/journal.pcbi.1004495)
Supplement: S9 Table — (XLSX) [file pcbi.1004495.s009.xlsx]

## Sheet: gefitinib
gefitinib	time	model	experimental			itraconazole	time	model	experimental			cocaine	time	model	experimental			diclofenac	time	model	experimental			diindolylmethane	time	model	experimental			perchloride	time	model	experimental			Phosphorothioate_Oligonucleotide	time	model	experimental			carbamate	time	model	experimental			melamine	time
	1	2.3092	2.6083				1	0.4238	0.00021671				0.3	0.1105	0.12				1	0.1059	0.1				0.5	10.434	2				1	0.5129	9				0.2	1.362	100				1	0.9087	10				0.5
	2	1.8414	1.9197				2	0.4238	0.0072588				0.7	0.0777	0.105				2	0.0712	0.55				1	10.434	8				6	0.0603	2				0.5	1.362	50				2	0.611	9				1
	3	1.5148	1.5226				3	0.285	0.0685				1.1	0.0546	0.0657				3	0.0479	0.3				3	7.071	3				12	0.0019255	0.5				1	1.362	20				3	0.4107	7				2
	4	1.2844	1.3013				4	0.285	0.1367				1.4	0.0419	0.0406				4	0.0322	0.08				5	5.3483	1				24	1.5229e-06	0.1				2	1.114	8				4	0.2762	5				3
	6	0.9973	0.9973				6	0.1288	0.2257				1.6	0.0351	0.0394				5	0.0217	0.05				8	4.0289	0.8										5	0.373	8				8	0.0564	2				4
	8	0.835	0.8683				8	0.0392	0.1535				2	0.0247	0.0308				6	0.0146	0.02				24	1.7672	0.5										24	7.5216e-05	6				12	0.0115	1				6
	12	0.6572	0.646				12	0.0119	0.1056				2.6	0.0145	0.0198																												24	9.8391e-05	0.5
	24	0.3935	0.4718				24	0.0080016	0.0577				3.1	0.009346	0.017
													4	0.0042241	0.0098663
													8	0.00012393	0.0019134
		1.12953	1					0.00051135	1					1.08597	1					0.944287	1					0.191681	1					17.5473	1					73.4214	1					11.0047	1
		1.04252	1					0.0171279	1					1.35135	1					7.72472	1					0.766724	1					33.1675	1					36.7107	1					14.73	1
		1.00515	1					0.240351	1					1.2033	1					6.26305	1					0.424268	1					259.673	1					14.6843	1					17.0441	1
		1.01316	1					0.479649	1					0.968974	1					2.48447	1					0.186975	1					65664.2	1					7.18133	1					18.1028	1
		1	1					1.75233	1					1.12251	1					2.30415	1					0.198565	1											21.4477	1					35.461	1
		1.03988	1					3.91582	1					1.24696	1					1.36986	1					0.282933	1											79770.3	1					86.9565	1
		0.982958	1					8.87395	1					1.36552	1																													5081.77	1
		1.19898	1					7.21106	1					1.81896	1
		0.0167768						0.998978						0.00739133						0.00310393						0.65338						273.812						5244.86						100.095
		0.00180812						0.966038						0.123448						45.2218						0.0544176						1034.75						1275.26						188.512
		2.65142e-05						0.577067						0.0413295						27.6997						0.331467						66911.6						187.26						257.412
		0.00017313						0.270765						0.000962628						2.20366						0.661009						4.31165e+09						38.2088						292.507
		0						0.565999						0.015008						1.7008						0.642297												418.109						1187.56
		0.00159043						8.50198						0.060991						0.136799						0.514184												6.36314e+09						7388.52
		0.00029043						61.9991						0.133603																														2.58142e+07
		0.0395944						38.5772						0.670695
		0.0602599						112.457						1.05343						76.9659						2.85676						4.31172e+09						6.36314e+09						2.58236e+07
		0.999996						2.83757e-21						0.99392						5.71538e-14						0.89793						0						0						0
[truncated: 2 more columns]
